# Supplementary material for: Enteric parasitic infections in children and dogs in resource-poor communities in northeastern Brazil: Identifying priority prevention and control areas
Source: PLOS journal article supplement (doi:10.1371/journal.pntd.0008378), 2020-06-09
Supplement: S4 (10.1371/journal.pntd.0008378.s004) [file journal.pntd.0008378.s004]

**S4 Table –** Univariate analysis of factors potentially associated with protozoa infections in children from the 10 districts of the Municipality of Ilhéus, Bahia, Brazil. (n=193)\*

| Variable                           |                      | n   | Infected (%) | p-value | OR   | 95% CI    |
|------------------------------------|----------------------|-----|--------------|---------|------|-----------|
| Age                                | ≤ 1 year             | 51  | 23 (45.1)    | -       | rc   | -         |
|                                    | > 1 year             | 140 | 93 (66.4)    | 0.01    | 2.40 | 1.25-4.63 |
| Sex                                | Female               | 86  | 51 (59.3)    | -       | rc   | -         |
|                                    | Male                 | 105 | 65 (61.9)    | 0.71    | 1.11 | 0.62-1.99 |
| Local                              | Semirural            | 73  | 44 (60.3)    | -       | rc   | -         |
|                                    | Rural                | 120 | 73 (60.8)    | 0.94    | 1.02 | 0.56-1.85 |
| Level of education of the mother   | HSI/Undergraduated** | 66  | 41 (62.1)    | -       | rc   | -         |
|                                    | E/M School***        | 117 | 74 (63.2)    | 0.88    | 1.05 | 0.56-1.95 |
| Income level                       | > US\$ 258.82****    | 16  | 7 (43.7)     | -       | rc   | -         |
|                                    | ≤ US\$ 258.82        | 169 | 105 (62.1)   | 0.15    | 0.47 | 0.17-1.33 |
| Contact dogs                       | No                   | 37  | 18 (48.6)    | -       | rc   | -         |
|                                    | Yes                  | 80  | 51 (63.7)    | 0.12    | 1.86 | 0.84-4.10 |
| Exposed to untreated water         | No                   | 21  | 12 (57.1)    | -       | rc   | -         |
|                                    | Yes                  | 166 | 101 (60.8)   | 0.74    | 1.16 | 0.46-2.92 |
| Annual doctor consultation         | Yes                  | 63  | 38 (60.3)    | -       | rc   | -         |
|                                    | No                   | 127 | 78 (61.4)    | 0.88    | 1.05 | 0.56-1.94 |
| Barefoot                           | No                   | 67  | 36 (53.7)    | -       | rc   | -         |
|                                    | Yes                  | 121 | 78 (64.5)    | 0.15    | 1.56 | 0.85-2.87 |
| Hands in mouth (habit)             | No                   | 30  | 18 (60)      | -       | rc   | -         |
|                                    | Yes                  | 159 | 96 (60.4)    | 0.28    | 1.5  | 0.72-3.11 |
| Wash hands after playing with soil | Yes                  | 84  | 53 (63.1)    | -       | rc   | -         |
|                                    | No                   | 101 | 59 (58.4)    | 0.52    | 0.82 | 0.45-1.49 |
| Type of water used to wash fruits  | Treated              | 31  | 21 (63.4)    | -       | rc   | -         |
|                                    | Untreated            | 146 | 89 (60.1)    | 0.71    | 0.86 | 0.39-1.88 |
| Anthelmintic treatment ☐           | Yes                  | 129 | 82 (63.6)    | -       | rc   | -         |
|                                    | No                   | 57  | 29 (50.9)    | 0.11    | 0.59 | 0.31-1.11 |

\* = Unanswered questions were discarded in the statistical analysis

\*\* = High School/Undergraduate Degree

\*\*\* = Elementary and Middle School

\*\*\*\* = Amount equivalent to a minimum monthly salary in Brazil, on 11/31/2016, according the Brazilian Central Bank

rc = reference category
