# Supplementary material for: Enteric parasitic infections in children and dogs in resource-poor communities in northeastern Brazil: Identifying priority prevention and control areas
Source: PLOS journal article supplement (doi:10.1371/journal.pntd.0008378), 2020-06-09
Supplement: S7 (10.1371/journal.pntd.0008378.s007) [file journal.pntd.0008378.s007]

## S7\_Table

**S7 Table** – Univariate analysis of factors potentially associated with helminth infections in dogs from the 10 districts of the Municipality of Ilhéus, Bahia, Brazil (n=143)\*.

| Variable                         |                     | n   | infected (%) | p-value | OR   | 95% CI    |
|----------------------------------|---------------------|-----|--------------|---------|------|-----------|
| Age                              | < 1 year            | 53  | 39 (73.6)    | -       | rc   | -         |
|                                  | > 1 year            | 90  | 58 (64.4)    | 0.26    | 0.65 | 0.30-1.37 |
| Sex                              | Female              | 59  | 42 (71.2)    | -       | rc   | -         |
|                                  | Male                | 84  | 55 (65.5)    | 0.47    | 0.76 | 0.37-1.58 |
| Level of restriction             | Restricted          | 37  | 27 (72.9)    | -       | rc   | -         |
|                                  | Semirestricted      | 106 | 70 (66.0)    | 0.44    | 0.72 | 0.31-1.65 |
| Breed                            | Yes                 | 30  | 17 (56.7)    | -       | rc   | -         |
|                                  | No                  | 113 | 80 (70.8)    | 0.14    | 1.85 | 0.81-4.24 |
| Local                            | Semirural           | 41  | 26 (63.4)    | -       | rc   | -         |
|                                  | Rural               | 102 | 71 (69.6)    | 0.47    | 1.32 | 0.62-2.83 |
| Level of education of dog owners | HS/Undergraduated** | 30  | 20 (66.7)    | -       | rc   | -         |
|                                  | E/M School***       | 98  | 68 (69.4)    | 0.78    | 1.13 | 0.47-2.71 |
| Income level                     | > US\$ 258.82****   | 35  | 19 (54.3)    | -       | rc   | -         |
|                                  | ≤ US\$ 258.82       | 97  | 70 (72.2)    | 0.06    | 2.18 | 0.98-4.85 |
| Contact with other dogs          | No                  | 30  | 21 (70)      | -       | rc   | -         |
|                                  | Yes                 | 113 | 76 (67.3)    | 0.77    | 0.88 | 0.36-2.11 |
| Exposure to untreated water      | No                  | 18  | 10 (55.5)    | -       | rc   | -         |
|                                  | Yes                 | 122 | 84 (68.8)    | 0.27    | 1.77 | 0.64-4.83 |
| Anthelmintic treatment           | Yes                 | 112 | 71 (63.4)    | -       | rc   | -         |
|                                  | No                  | 30  | 25 (83.3)    | 0.04    | 2.88 | 1.03-8.12 |

\*= Unanswered questions were discarded in the statistical analysis

\*\*= High School/Undergraduate Degree

\*\*\*= Elementary and Middle School

\*\*\*\*= Amount equivalent to a minimum monthly salary in Brazil, on 11/31/2016, according the Brazilian Central Bank

rc = reference category
